# Supplementary material for: Exploring Social Biomarkers in High-Functioning Adults with Autism and Asperger’s Versus Healthy Controls: A Cross-Sectional Analysis
Source: Springer Nature journal article supplement (doi:10.1007/s10803-020-04493-5), 2020-04-11
Supplement: MOESM2 [file 17888064]

**Protocol: BP28421 & BP27801**

**Summary of Statistical Analysis: Treatment comparison as estimated from ANCOVA**

**Assessment details=Autism-Spectrum Quotient**

**Covariate VIQ**

|             | <i>LSMean<br/>ASD<br/>Participants</i> | <i>LSMean<br/>Healthy<br/>Controls</i> | <i>Estimate<br/>ASD<br/>Participants<br/>-<br/>Healthy<br/>Controls</i> | <i>90% CI</i> |              | <i>p-value</i> |
|-------------|----------------------------------------|----------------------------------------|-------------------------------------------------------------------------|---------------|--------------|----------------|
|             |                                        |                                        |                                                                         | <i>Lower</i>  | <i>Upper</i> |                |
| Total score | 29.002                                 | 13.735                                 | 15.268                                                                  | 11.076        | 19.460       | <0.001         |

**Protocol: BP28421 & BP27801**

**Summary of Statistical Analysis: Treatment comparison as estimated from ANCOVA**

**Assessment details=Affective Speech Recognition (ASR)**

**Covariate VIQ**

|                            | LSMean<br>ASD<br>Participants | LSMean<br>Healthy<br>Controls | Estimate<br>ASD<br>Participants<br>-<br>Healthy<br>Controls | 90% CI  |        | p-value |
|----------------------------|-------------------------------|-------------------------------|-------------------------------------------------------------|---------|--------|---------|
|                            |                               |                               |                                                             | Lower   | Upper  |         |
| % (Angry)                  | 55.429                        | 56.381                        | -0.952                                                      | -13.521 | 11.617 | 0.900   |
| % (Disgust)                | 61.590                        | 70.256                        | -8.666                                                      | -20.529 | 3.197  | 0.226   |
| % (Fearful)                | 56.285                        | 47.857                        | 8.428                                                       | -3.683  | 20.539 | 0.249   |
| % (Happy)                  | 51.607                        | 62.744                        | -11.137                                                     | -22.067 | -0.207 | 0.094   |
| % (Lust)                   | 56.067                        | 57.326                        | -1.259                                                      | -13.044 | 10.526 | 0.859   |
| % (Negative emotions)      | 53.862                        | 56.077                        | -2.215                                                      | -11.195 | 6.765  | 0.681   |
| % (Neutral)                | 67.790                        | 76.060                        | -8.271                                                      | -20.375 | 3.834  | 0.258   |
| % (Positive emotions)      | 54.085                        | 56.081                        | -1.996                                                      | -10.247 | 6.254  | 0.687   |
| % (Sad)                    | 58.130                        | 59.643                        | -1.513                                                      | -15.573 | 12.546 | 0.857   |
| % (Surprise)               | 63.759                        | 54.479                        | 9.280                                                       | -0.993  | 19.554 | 0.136   |
| % Correct answers          | 55.263                        | 58.063                        | -2.801                                                      | -9.707  | 4.106  | 0.500   |
| Tot n. (Angry)             | 3.326                         | 3.383                         | -0.057                                                      | -0.811  | 0.697  | 0.900   |
| Tot n. (Disgust)           | 3.695                         | 4.215                         | -0.520                                                      | -1.232  | 0.192  | 0.226   |
| Tot n. (Fearful)           | 3.377                         | 2.871                         | 0.506                                                       | -0.221  | 1.232  | 0.249   |
| Tot n. (Happy)             | 3.096                         | 3.765                         | -0.668                                                      | -1.324  | -0.012 | 0.094   |
| Tot n. (Lust)              | 3.364                         | 3.440                         | -0.076                                                      | -0.783  | 0.632  | 0.859   |
| Tot n. (Neg.emotions)      | 12.927                        | 13.458                        | -0.532                                                      | -2.687  | 1.624  | 0.681   |
| Tot n. (Neutral)           | 4.067                         | 4.564                         | -0.496                                                      | -1.222  | 0.230  | 0.258   |
| Tot n. (Positive emotions) | 9.735                         | 10.095                        | -0.359                                                      | -1.844  | 1.126  | 0.687   |
| Tot n. (Sad)               | 3.488                         | 3.579                         | -0.091                                                      | -0.934  | 0.753  | 0.857   |
| Tot n. (Surprise)          | 3.826                         | 3.269                         | 0.557                                                       | -0.060  | 1.173  | 0.136   |
| Tot n. correct answers     | 26.526                        | 27.870                        | -1.344                                                      | -4.660  | 1.971  | 0.500   |

**Protocol: BP28421 & BP27801**

**Summary of Statistical Analysis: Treatment comparison as estimated from ANCOVA**

**Assessment details=Eye Tracking - Activity Monitoring**

**Covariate VIQ**

|                                   | <i>LSMean<br/>ASD<br/>Participants</i> | <i>LSMean<br/>Healthy<br/>Controls</i> | <i>Estimate<br/>ASD<br/>Participants<br/>-<br/>Healthy<br/>Controls</i> | <i>90% CI</i> |              | <i>p-value</i> |
|-----------------------------------|----------------------------------------|----------------------------------------|-------------------------------------------------------------------------|---------------|--------------|----------------|
|                                   |                                        |                                        |                                                                         | <i>Lower</i>  | <i>Upper</i> |                |
| Activity (ratio)                  | 0.394                                  | 0.317                                  | 0.077                                                                   | 0.012         | 0.142        | 0.054          |
| Background (ratio)                | 0.110                                  | 0.114                                  | -0.004                                                                  | -0.028        | 0.020        | 0.796          |
| Background wo distractors (ratio) | 0.244                                  | 0.234                                  | 0.010                                                                   | -0.038        | 0.058        | 0.732          |
| Body (ratio)                      | 0.131                                  | 0.117                                  | 0.014                                                                   | -0.020        | 0.049        | 0.489          |
| Distractors (ratio)               | 0.134                                  | 0.120                                  | 0.014                                                                   | -0.026        | 0.053        | 0.563          |
| Head (ratio)                      | 0.231                                  | 0.332                                  | -0.101                                                                  | -0.153        | -0.050       | 0.002          |
| Person (ratio)                    | 0.362                                  | 0.449                                  | -0.087                                                                  | -0.141        | -0.033       | 0.010          |

**Protocol: BP28421 & BP27801**

**Summary of Statistical Analysis: Treatment comparison as estimated from ANCOVA**

**Assessment details=Eye Tracking – Biodetection**

**Covariate VIQ**

|                              | <i>LSMean<br/>ASD<br/>Participants</i> | <i>LSMean<br/>Healthy<br/>Controls</i> | <i>Estimate<br/>ASD<br/>Participants<br/>-<br/>Healthy<br/>Controls</i> | <i>90% CI</i> |              | <i>p-value</i> |
|------------------------------|----------------------------------------|----------------------------------------|-------------------------------------------------------------------------|---------------|--------------|----------------|
|                              |                                        |                                        |                                                                         | <i>Lower</i>  | <i>Upper</i> |                |
| D-prime<br>(masked<br>cond.) | 1.256                                  | 1.689                                  | -0.432                                                                  | -1.023        | 0.159        | 0.226          |

**Protocol: BP28421 & BP27801**

**Summary of Statistical Analysis: Treatment comparison as estimated from ANCOVA**

**Assessment details=Eye Tracking – Biomotion**

**Covariate VIQ**

|                           | <i>LSMean<br/>ASD<br/>Participants</i> | <i>LSMean<br/>Healthy<br/>Controls</i> | <i>Estimate<br/>ASD<br/>Participants<br/>-<br/>Healthy<br/>Controls</i> | <i>90% CI</i> |              | <i>p-value</i> |
|---------------------------|----------------------------------------|----------------------------------------|-------------------------------------------------------------------------|---------------|--------------|----------------|
|                           |                                        |                                        |                                                                         | <i>Lower</i>  | <i>Upper</i> |                |
| Latency (ms)              | 301.057                                | 262.949                                | 38.107                                                                  | -9.811        | 86.026       | 0.189          |
| Looking pref<br>(ratio)   | 0.545                                  | 0.620                                  | -0.076                                                                  | -0.130        | -0.021       | 0.023          |
| Orienting pref<br>(ratio) | 0.484                                  | 0.492                                  | -0.008                                                                  | -0.041        | 0.025        | 0.672          |

**Protocol: BP28421 & BP27801**

**Summary of Statistical Analysis: Treatment comparison as estimated from ANCOVA**

**Assessment details=Eye Tracking – WAVV**

**Covariate VIQ**

|                    | <i>LSMean<br/>ASD<br/>Participants</i> | <i>LSMean<br/>Healthy<br/>Controls</i> | <i>Estimate<br/>ASD<br/>Participants<br/>-<br/>Healthy<br/>Controls</i> | <i>90% CI</i> |              | <i>p-value</i> |
|--------------------|----------------------------------------|----------------------------------------|-------------------------------------------------------------------------|---------------|--------------|----------------|
|                    |                                        |                                        |                                                                         | <i>Lower</i>  | <i>Upper</i> |                |
| Background (ratio) | 0.114                                  | 0.100                                  | 0.014                                                                   | -0.010        | 0.038        | 0.323          |
| Body (ratio)       | 0.098                                  | 0.079                                  | 0.019                                                                   | -0.007        | 0.045        | 0.222          |
| Eyes (ratio)       | 0.417                                  | 0.447                                  | -0.031                                                                  | -0.117        | 0.055        | 0.551          |
| Head (ratio)       | 0.772                                  | 0.813                                  | -0.041                                                                  | -0.087        | 0.005        | 0.145          |
| Mouth (ratio)      | 0.262                                  | 0.292                                  | -0.030                                                                  | -0.098        | 0.039        | 0.469          |

**Protocol: BP28421 & BP27801**

**Summary of Statistical Analysis: Treatment comparison as estimated from ANCOVA**

**Assessment details=Eye Tracking - Gaze Discrimination**

**Covariate VIQ**

|                     | <i>LSMean<br/>ASD<br/>Participants</i> | <i>LSMean<br/>Healthy<br/>Controls</i> | <i>Estimate<br/>ASD<br/>Participants<br/>-<br/>Healthy<br/>Controls</i> | <i>90% CI</i> |              | <i>p-value</i> |
|---------------------|----------------------------------------|----------------------------------------|-------------------------------------------------------------------------|---------------|--------------|----------------|
|                     |                                        |                                        |                                                                         | <i>Lower</i>  | <i>Upper</i> |                |
| Eyes (ratio)        | 0.411                                  | 0.415                                  | -0.005                                                                  | -0.103        | 0.093        | 0.934          |
| Inside face (ratio) | 0.937                                  | 0.954                                  | -0.017                                                                  | -0.051        | 0.016        | 0.391          |
| Mouth (ratio)       | 0.075                                  | 0.070                                  | 0.005                                                                   | -0.032        | 0.041        | 0.833          |
| Nose (ratio)        | 0.297                                  | 0.331                                  | -0.034                                                                  | -0.100        | 0.032        | 0.389          |

**Protocol: BP28421 & BP27801**

**Summary of Statistical Analysis: Treatment comparison as estimated from ANCOVA**

**Assessment details=Eye Tracking - Gender Discrimination**

**Covariate VIQ**

|                     | <i>LSMean<br/>ASD<br/>Participants</i> | <i>LSMean<br/>Healthy<br/>Controls</i> | <i>Estimate<br/>ASD<br/>Participants<br/>-<br/>Healthy<br/>Controls</i> | <i>90% CI</i> |              | <i>p-value</i> |
|---------------------|----------------------------------------|----------------------------------------|-------------------------------------------------------------------------|---------------|--------------|----------------|
|                     |                                        |                                        |                                                                         | <i>Lower</i>  | <i>Upper</i> |                |
| Eyes (ratio)        | 0.236                                  | 0.191                                  | 0.045                                                                   | -0.031        | 0.120        | 0.324          |
| Inside face (ratio) | 0.938                                  | 0.941                                  | -0.003                                                                  | -0.044        | 0.038        | 0.909          |
| Mouth (ratio)       | 0.122                                  | 0.112                                  | 0.011                                                                   | -0.033        | 0.055        | 0.682          |
| Nose (ratio)        | 0.411                                  | 0.465                                  | -0.054                                                                  | -0.125        | 0.017        | 0.211          |



**Protocol: BP28421 & BP27801**

**Summary of Statistical Analysis: Treatment comparison as estimated from ANCOVA**

**Assessment details=Eye Tracking – Pupillometry**

**Covariate VIQ**

|                               | <i>LSMean<br/>ASD<br/>Participants</i> | <i>LSMean<br/>Healthy<br/>Controls</i> | <i>Estimate<br/>ASD<br/>Participants<br/>-<br/>Healthy<br/>Controls</i> | <i>90% CI</i> |              | <i>p-value</i> |
|-------------------------------|----------------------------------------|----------------------------------------|-------------------------------------------------------------------------|---------------|--------------|----------------|
|                               |                                        |                                        |                                                                         | <i>Lower</i>  | <i>Upper</i> |                |
| from Activity Monitoring (mm) | 3.710                                  | 3.343                                  | 0.367                                                                   | 0.087         | 0.647        | 0.033          |
| from Biodetection (mm)        | 4.514                                  | 4.126                                  | 0.388                                                                   | -0.021        | 0.797        | 0.118          |
| from Biomotion (mm)           | 4.270                                  | 3.968                                  | 0.301                                                                   | -0.006        | 0.608        | 0.106          |
| from Gaze discr. (mm)         | 3.666                                  | 3.313                                  | 0.354                                                                   | 0.067         | 0.640        | 0.044          |
| from Gender discr. (mm)       | 3.667                                  | 3.312                                  | 0.355                                                                   | 0.069         | 0.641        | 0.043          |
| from Human activity (mm)      | 3.711                                  | 3.458                                  | 0.253                                                                   | -0.029        | 0.535        | 0.139          |
| from WAVV (mm)                | 4.045                                  | 3.674                                  | 0.371                                                                   | 0.071         | 0.672        | 0.044          |

**Protocol: BP28421 & BP27801**

**Summary of Statistical Analysis: Treatment comparison as estimated from ANCOVA**

**Assessment details=Eye Tracking - Human activity**

**Covariate VIQ**

|                       | <i>LSMean<br/>ASD<br/>Participants</i> | <i>LSMean<br/>Healthy<br/>Controls</i> | <i>Estimate<br/>ASD<br/>Participants<br/>-<br/>Healthy<br/>Controls</i> | <i>90% CI</i> |              | <i>p-value</i> |
|-----------------------|----------------------------------------|----------------------------------------|-------------------------------------------------------------------------|---------------|--------------|----------------|
|                       |                                        |                                        |                                                                         | <i>Lower</i>  | <i>Upper</i> |                |
| Preference<br>(ratio) | 0.563                                  | 0.649                                  | -0.086                                                                  | -0.199        | 0.028        | 0.211          |

**Protocol: BP28421 & BP27801**

**Summary of Statistical Analysis: Treatment comparison as estimated from ANCOVA**

**Assessment details=Eye Tracking – Total**

**Covariate VIQ**

|                 | <i>LSMean<br/>ASD<br/>Participants</i> | <i>LSMean<br/>Healthy<br/>Controls</i> | <i>Estimate<br/>ASD<br/>Participants<br/>-<br/>Healthy<br/>Controls</i> | <i>90% CI</i> |              | <i>p-value</i> |
|-----------------|----------------------------------------|----------------------------------------|-------------------------------------------------------------------------|---------------|--------------|----------------|
|                 |                                        |                                        |                                                                         | <i>Lower</i>  | <i>Upper</i> |                |
| Composite score | -0.167                                 | 0.241                                  | -0.407                                                                  | -0.870        | 0.056        | 0.147          |

**Protocol: BP28421 & BP27801**

**Summary of Statistical Analysis: Treatment comparison as estimated from ANCOVA**

**Assessment details=Read the Mind in the Eyes Test (RMET)**

**Covariate VIQ**

|                        | <i>LSMean<br/>ASD<br/>Participants</i> | <i>LSMean<br/>Healthy<br/>Controls</i> | <i>Estimate<br/>ASD<br/>Participants<br/>-<br/>Healthy<br/>Controls</i> | <i>90% CI</i> |              | <i>p-value</i> |
|------------------------|----------------------------------------|----------------------------------------|-------------------------------------------------------------------------|---------------|--------------|----------------|
|                        |                                        |                                        |                                                                         | <i>Lower</i>  | <i>Upper</i> |                |
| % correct answers      | 66.384                                 | 76.014                                 | -9.630                                                                  | -19.061       | -0.199       | 0.093          |
| Tot n. correct answers | 23.898                                 | 27.365                                 | -3.467                                                                  | -6.862        | -0.072       | 0.093          |

**Protocol: BP28421 & BP27801**

**Summary of Statistical Analysis: Treatment comparison as estimated from ANCOVA**

**Assessment details=Smell Test**

**Covariate VIQ**

|                        | <i>LSMean<br/>ASD<br/>Participants</i> | <i>LSMean<br/>Healthy<br/>Controls</i> | <i>Estimate<br/>ASD<br/>Participants<br/>-<br/>Healthy<br/>Controls</i> | <i>90% CI</i> |              | <i>p-value</i> |
|------------------------|----------------------------------------|----------------------------------------|-------------------------------------------------------------------------|---------------|--------------|----------------|
|                        |                                        |                                        |                                                                         | <i>Lower</i>  | <i>Upper</i> |                |
| % correct answers      | 85.163                                 | 89.858                                 | -4.694                                                                  | -11.910       | 2.521        | 0.279          |
| Tot n. correct answers | 10.219                                 | 10.781                                 | -0.562                                                                  | -1.428        | 0.303        | 0.280          |

**Protocol: BP28421 & BP27801**

**Summary of Statistical Analysis: Treatment comparison as estimated from ANCOVA**

**Assessment details=STAI scale**

**Covariate VIQ**

|             | <i>LSMean<br/>ASD<br/>Participants</i> | <i>LSMean<br/>Healthy<br/>Controls</i> | <i>Estimate<br/>ASD<br/>Participants<br/>-<br/>Healthy<br/>Controls</i> | <i>90% CI</i> |              | <i>p-value</i> |
|-------------|----------------------------------------|----------------------------------------|-------------------------------------------------------------------------|---------------|--------------|----------------|
|             |                                        |                                        |                                                                         | <i>Lower</i>  | <i>Upper</i> |                |
| Total score | 38.916                                 | 30.641                                 | 8.276                                                                   | 1.516         | 15.035       | 0.045          |
